# Supplementary material
Source: MDPI journal article supplement (https://www.mdpi.com/2311-7524/9/12/1341)
Supplement: s1 [file s1]

Table S1. Pair of primers used in this study

| Gene       | MDP           | Sequence 5'-3'            | length |
|------------|---------------|---------------------------|--------|
| MdAHK4-F   | MDP0000151825 | TGAGGGCTAGTATGGTGGCT      | 20     |
| MdAHK4-R   | MDP0000151825 | ATCCATTCGGCACCACCTCTC     | 20     |
| MdARR1-F   | MDP0000224740 | ACTGGAGATGGACCTGCCTGTT    | 22     |
| MdARR1-R   | MDP0000224740 | CGCCTCAATGCGAACTGGTTTG    | 22     |
| MdARR3-F   | MDP0000290818 | GCTTGCCAACTTGCACCAGTCT    | 22     |
| MdARR3-R   | MDP0000290818 | CGCCTCTGCCGCTATCAACAAT    | 22     |
| MdCKX5-F   | MDP0000250917 | TTTTTACCTTGTGGCGCTGC      | 20     |
| MdCKX5-R   | MDP0000250917 | TGCGGGAGGTACTGTTTCAC      | 20     |
| MdARF7-F   | MDP0000185253 | ACGCCACTTGCTTACAACAGGA    | 22     |
| MdARF7-R   | MDP0000185253 | ACGCCATTGTGAGTGCTTCCAT    | 22     |
| MdARF19-F  | MDP0000876321 | ACGGCTCTGTTGCTCCTAACCA    | 22     |
| MdARF19-R  | MDP0000876321 | CGGCTGCTGCTGTTGCTGAA      | 20     |
| MdWOX5-F   | MDP0000213910 | TCCGAACGCCGAGCACTGAT      | 20     |
| MdWOX5-R   | MDP0000213910 | TGAAGGGTCTCAATCACTCTTGCC  | 24     |
| MdWOX11-F  | MDP0000136426 | CCGAAGCCAGAGCAAATCCT      | 20     |
| MdWOX11-R  | MDP0000136426 | TTCAAGGCTTGCCTGCAACT      | 20     |
| MdLBD16-F  | MDP0000145761 | CGCCAGCAATGTGTCCAAGTT     | 21     |
| MdLBD16-R  | MDP0000145761 | GTGAGCCACGCATCCATAAACG    | 22     |
| MdLBD29-F  | MDP0000131964 | CGCCAGCAATGTGTCCAAGTTG    | 22     |
| MdLBD29-R  | MDP0000131964 | TGGTGAGCCAGTTGAGCCTTTG    | 22     |
| MdARRO1-F  | MDP0000820500 | GCTCAGACTCTCCACAAAACCTACA | 24     |
| MdARRO1-R  | MDP0000820500 | ATTGGCATTAGGCTCACTTCTCT   | 23     |
| MdPIN3-F   | MDP0000497581 | ACAATTCAACAGCAGCAGCA      | 20     |
| MdPIN3-R   | MDP0000497581 | CGGTCCCACCAAAAACATGG      | 20     |
| MdIAA23-F  | MDP0000253285 | TTCTCAGCCTCCACCTTCCAAG    | 22     |
| MdIAA23-R  | MDP0000253285 | TCCAAGCAGCATCCAATCTCCA    | 22     |
| MdAUX1.2-F | MDP0000749280 | GCAGCACAGAAGCAATCAGAGG    | 22     |
| MdAUX1.2-R | MDP0000749280 | CCGCCATGCCAGAGGAAGTT      | 20     |
| MdAHP1-F   | MD04G1212100  | GAGGGCCTGCATTTCATTCC      | 20     |
| MdAHP1-R   | MD04G1212100  | AGCCGCCACAACCTGTCT        | 18     |
| MdARR5-F   | MD06G1182400  | CTTTACCGCAGCTTTCGCA       | 19     |
| MdARR5-R   | MD06G1182400  | TTTGATGACGAACATGGCAACG    | 22     |
| MdTCP17-F  | MDP0000120671 | CTTGGTCTTAGCCAACCTAGCA    | 22     |
| MdTCP17-R  | MDP0000120671 | GAGGAACCTGAAGTGGAGGGA     | 21     |
| MdARR12-F  | MD13G1108300  | GATGCTTTGCACTTGCTTCG      | 20     |
| MdARR12-R  | MD13G1108300  | AAGTGAGGTCATCTGCGCTA      | 20     |
| MdHB30-F   | MDP0000821959 | GATGACGAGGAGGAGGATGA      | 20     |
| MdHB30-R   | MDP0000821959 | TCAAGAAGAAGAAGACGACCCA    | 22     |
| EF-1a-F    |               | ATTCAAGTATGCCTGGGTGC      | 20     |
| EF-1a-F    |               | ATTCAAGTATGCCTGGGTGC      | 20     |
